# Supplementary material
Source: publisher figshare collection journal article supplement (https://sage.figshare.com/ndownloader/files/13316483)
Supplement: Supplementary file 1 [file 13316483]

## Appendix A

Table. Correlation matrix (n = 1,751)

|                             | 1   | 2   | 3   | 4   | 5   | 6   | 7   | 8   | 9   | 10  | 11  | 12  | 13  | 14  | 15  | 16  | 17  | 18  | 19  | 20 | 21 | 22 | 23 | 24 | 25 |
|-----------------------------|-----|-----|-----|-----|-----|-----|-----|-----|-----|-----|-----|-----|-----|-----|-----|-----|-----|-----|-----|----|----|----|----|----|----|
| 1- Sex                      |     |     |     |     |     |     |     |     |     |     |     |     |     |     |     |     |     |     |     |    |    |    |    |    |    |
| 2- Work-to-family conflict  | .08 |     |     |     |     |     |     |     |     |     |     |     |     |     |     |     |     |     |     |    |    |    |    |    |    |
| 3- Family-to-work conflict  | .01 | .38 |     |     |     |     |     |     |     |     |     |     |     |     |     |     |     |     |     |    |    |    |    |    |    |
| 4- Work hours               | .24 | .23 | .07 |     |     |     |     |     |     |     |     |     |     |     |     |     |     |     |     |    |    |    |    |    |    |
| 5-Shiftwork                 | .07 | .07 | .02 | .09 |     |     |     |     |     |     |     |     |     |     |     |     |     |     |     |    |    |    |    |    |    |
| 6- Irregular work schedule  | .09 | .24 | .01 | .22 | .20 |     |     |     |     |     |     |     |     |     |     |     |     |     |     |    |    |    |    |    |    |
| 7- Psychological demands    | .05 | .45 | .09 | .26 | .02 | .24 |     |     |     |     |     |     |     |     |     |     |     |     |     |    |    |    |    |    |    |
| 8- Job insecurity           | .00 | .33 | .17 | .03 | .05 | .09 | .22 |     |     |     |     |     |     |     |     |     |     |     |     |    |    |    |    |    |    |
| 9- Conflict at work         | .01 | .23 | .15 | .11 | .08 | .15 | .28 | .26 |     |     |     |     |     |     |     |     |     |     |     |    |    |    |    |    |    |
| 10- Recognition             | .05 | .30 | .19 | .02 | .03 | .07 | .22 | .47 | .40 |     |     |     |     |     |     |     |     |     |     |    |    |    |    |    |    |
| 11- Skill utilization       | .12 | .00 | .11 | .19 | .04 | .13 | .21 | .18 | .09 | .33 |     |     |     |     |     |     |     |     |     |    |    |    |    |    |    |
| 12- Decision authority      | .11 | .06 | .12 | .11 | .03 | .07 | .08 | .21 | .11 | .36 | .63 |     |     |     |     |     |     |     |     |    |    |    |    |    |    |
| 13- Support from colleagues | .02 | .19 | .12 | .01 | .03 | .04 | .11 | .27 | .25 | .50 | .26 | .23 |     |     |     |     |     |     |     |    |    |    |    |    |    |
| 14- Supervisor support      | .02 | .22 | .07 | .02 | .02 | .04 | .18 | .34 | .29 | .62 | .31 | .37 | .37 |     |     |     |     |     |     |    |    |    |    |    |    |
| 15- Career perspectives     | .02 | .15 | .16 | .08 | .02 | .00 | .07 | .33 | .20 | .51 | .44 | .39 | .31 | .40 |     |     |     |     |     |    |    |    |    |    |    |
| 16- Housework               | .02 | .07 | .04 | .02 | .02 | .01 | .05 | .06 | .03 | .03 | .00 | .01 | .05 | .01 | .01 |     |     |     |     |    |    |    |    |    |    |
| 17- Marital strains         | .01 | .16 | .21 | .01 | .01 | .05 | .08 | .09 | .06 | .09 | .03 | .01 | .06 | .04 | .08 | .05 |     |     |     |    |    |    |    |    |    |
| 18- Parental strains        | .04 | .13 | .17 | .02 | .00 | .01 | .08 | .10 | .06 | .08 | .00 | .01 | .04 | .03 | .06 | .11 | .17 |     |     |    |    |    |    |    |    |
| 19- Caregiving              | .03 | .00 | .02 | .00 | .06 | .00 | .03 | .05 | .02 | .03 | .03 | .01 | .08 | .01 | .00 | .11 | .02 | .02 |     |    |    |    |    |    |    |
| 20- Communte time           | .10 | .13 | .02 | .00 | .02 | .07 | .12 | .08 | .05 | .03 | .06 | .07 | .01 | .04 | .04 | .00 | .08 | .03 | .02 |    |    |    |    |    |    |

|                                 |     |     |     |     |     |     |     |     |     |     |     |     |     |     |     |     |     |     |     |     |     |     |     |     |
|---------------------------------|-----|-----|-----|-----|-----|-----|-----|-----|-----|-----|-----|-----|-----|-----|-----|-----|-----|-----|-----|-----|-----|-----|-----|-----|
| 21- Social support outside work | .08 | .16 | .12 | .06 | .02 | .04 | .05 | .13 | .07 | .18 | .11 | .08 | .14 | .20 | .13 | .00 | .21 | .12 | .04 | .01 |     |     |     |     |
| 22- Family income               | .02 | .12 | .12 | .16 | .08 | .12 | .22 | .04 | .06 | .09 | .28 | .31 | .07 | .08 | .17 | .02 | .08 | .09 | .03 | .19 | .03 |     |     |     |
| 23- Age                         | .07 | .02 | .16 | .04 | .11 | .02 | .03 | .01 | .12 | .01 | .15 | .10 | .04 | .05 | .09 | .11 | .02 | .09 | .09 | .07 | .07 | .21 |     |     |
| 24- Marital status              | .08 | .03 | .05 | .04 | .05 | .01 | .03 | .00 | .08 | .07 | .11 | .09 | .05 | .04 | .08 | .10 | .32 | .09 | .02 | .06 | .01 | .42 | .09 |     |
| 25- Number of children          | .03 | .06 | .09 | .05 | .08 | .01 | .06 | .02 | .04 | .00 | .09 | .07 | .05 | .00 | .01 | .10 | .15 | .39 | .03 | .00 | .05 | .24 | .07 | .29 |
